# Supplementary material
Source: publisher figshare collection journal article supplement (https://tandf.figshare.com/ndownloader/files/11122535)
Supplement: Supplementary file 1 [file 11122535]

# SUPPLEMENTARY MATERIAL

## Furanocoumarins with potential antiproliferative activities from *Clausena lenis*

Yan-Ping Liu<sup>b,c</sup>, Qing Wen<sup>b,c,d</sup>, Shi Hu<sup>b,c,d</sup>, Yan-Lei Ma<sup>b,c,d</sup>, Zhi-Hua Jiang<sup>b,c,d</sup>, Jin-Ying Tang<sup>b,c,d</sup>, Shen-Xiang Qiu<sup>a,\*</sup>, Yan-Hui Fu<sup>a,b,c,d,\*</sup>

<sup>a</sup> Guangdong Provincial Key Laboratory of Applied Botany, South China Botanical Garden, Chinese Academy of Sciences, Guangzhou 510650, P. R. China;

<sup>b</sup> Key Laboratory of Tropical Medicinal Plant Chemistry of Ministry of Education, Hainan Normal University, Haikou 571158, P. R. China

<sup>c</sup> Key Laboratory of Southern Medicinal Plants Resources of Haikou City, Hainan Normal University, Haikou 571158, P.R. China

<sup>d</sup> College of Pharmacy, Fujian University of Traditional Chinese Medicine, Fuzhou 350122, P.R. China

\*Corresponding author.

Tel./ Fax: +86-898-65889422; E-mail: fuyanhui80@126.com; sxqiu@scbg.ac.cn

### ABSTRACT

A phytochemical investigation on the stems and leaves of *Clausena lenis* led to the isolation of a new furanocoumarin, clauselenisin A (**1**), together with five known analogues (**2–6**). The structure of **1** was elucidated by extensive spectroscopic methods and the known compounds were identified by comparisons with data reported in the literature. All known compounds (**2–6**) were isolated from *C. lenis* for the first time. All isolated compounds were evaluated for their antiproliferative activities against five human cancer cell lines: HL-60, SMMC-7721, A-549, MCF-7 and SW480 *in vitro*. Compounds **1–6** showed significant antiproliferative effects with IC<sub>50</sub> values ranging from 0.36 to 16.48 μM.

**Keywords:** *Clausena lenis*; furanocoumarin; clauselenisin A ; antiproliferative activities.

---

\*Corresponding author. Tel.: +86-86-898-65889422; Fax: +86-898-65889422;  
E-mail: fuyanhui80@163.com; sxqiu@scbg.ac.cn

# List of Supplementary Material

**Figure S1.** Selected 2D NMR correlations for clauselenisin A (**1**).

**Figure S2.**  $^1\text{H}$ -NMR spectrum of clauselenisin A (**1**) in  $\text{CDCl}_3$ .

**Figure S3.**  $^{13}\text{C}$ -NMR spectrum of clauselenisin A (**1**) in  $\text{CDCl}_3$ .

**Figure S4.** DEPT spectra of clauselenisin A (**1**) in  $\text{CDCl}_3$ .

**Figure S5.** HSQC spectrum of clauselenisin A (**1**) in  $\text{CDCl}_3$ .

**Figure S6.** HMBC spectrum of clauselenisin A (**1**) in  $\text{CDCl}_3$ .

**Figure S7.**  $^1\text{H}$ - $^1\text{H}$  COSY spectrum of clauselenisin A (**1**) in  $\text{CDCl}_3$ .

**Figure S8.** ROESY spectrum of clauselenisin A (**1**) in  $\text{CDCl}_3$ .

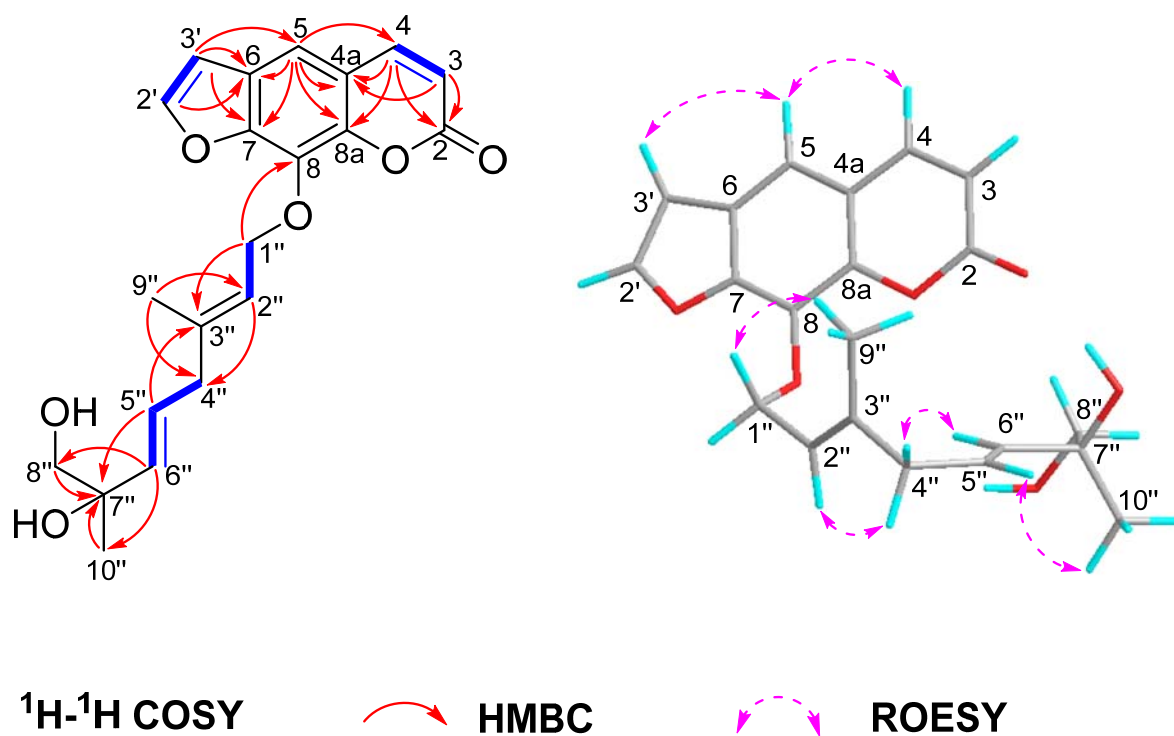

Figure S1. Selected 2D NMR correlations for clauselenisin A (**1**).

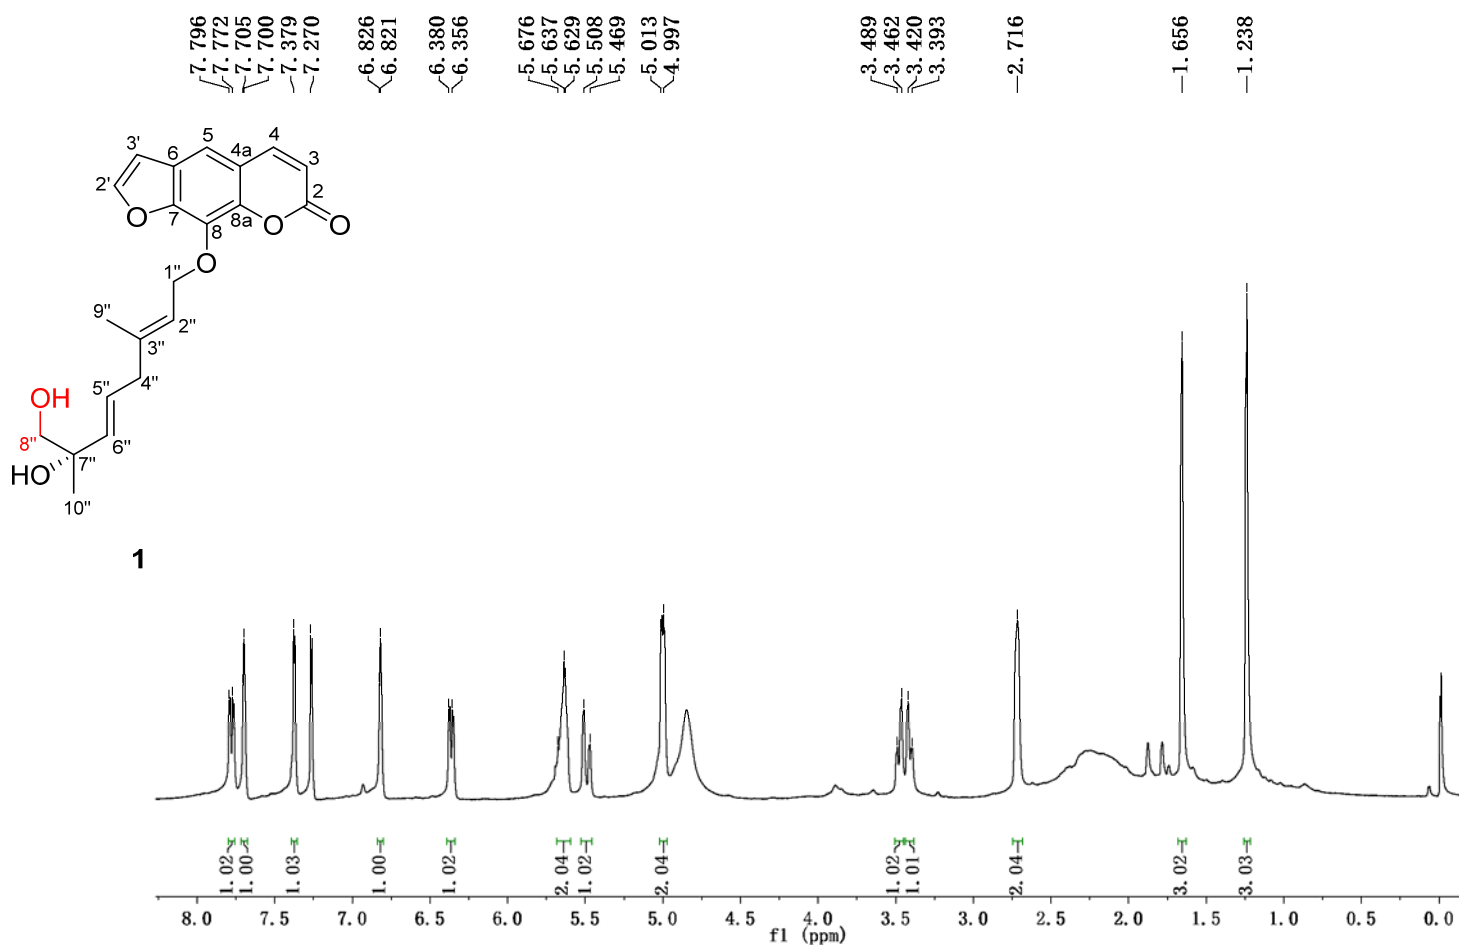

Figure S2.  $^1\text{H}$ -NMR spectrum of clauselenisin A (**1**) in  $\text{CDCl}_3$ .

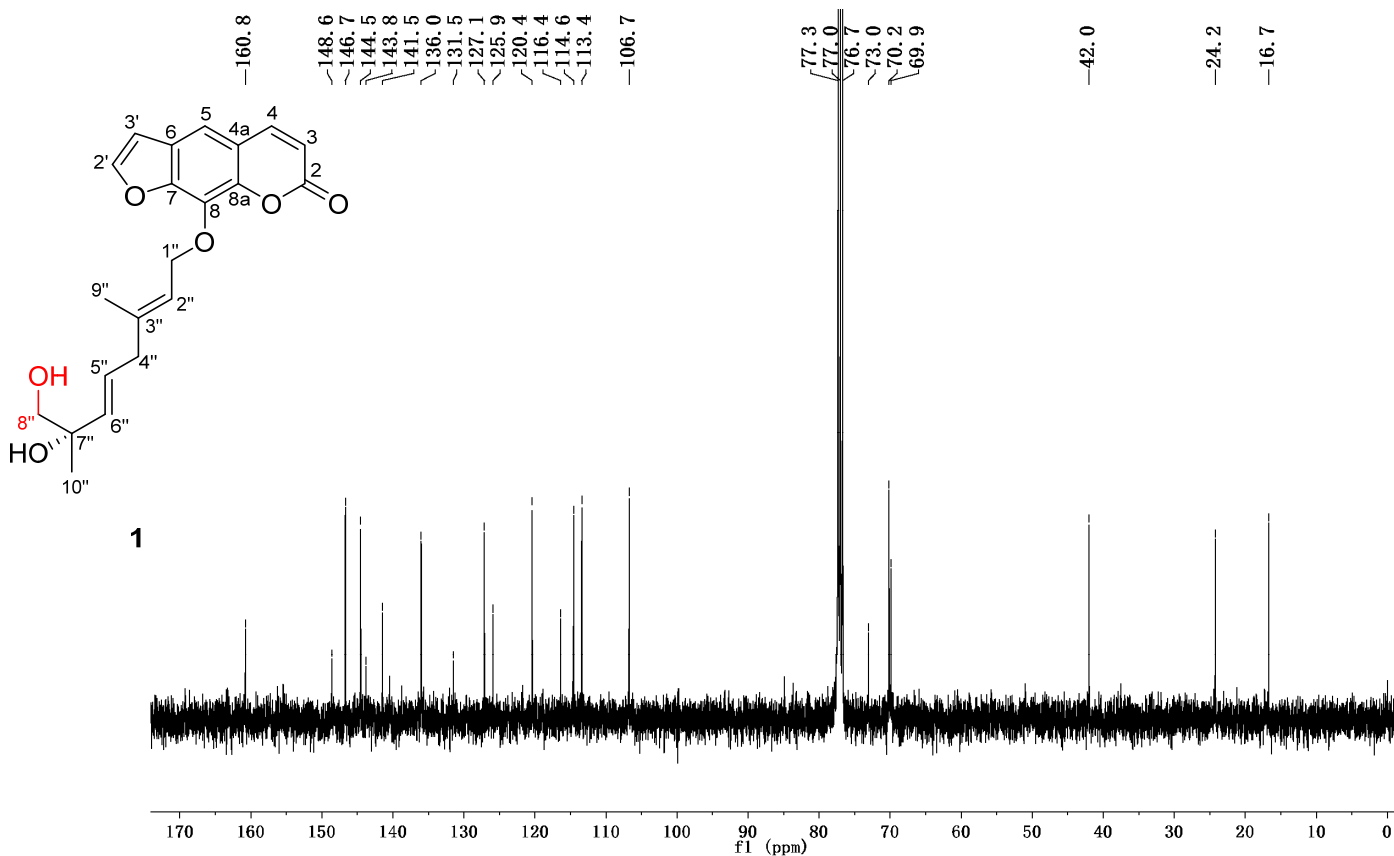

Figure S3.  $^{13}\text{C}$ -NMR spectrum of clauselenisin A (1) in  $\text{CDCl}_3$ .

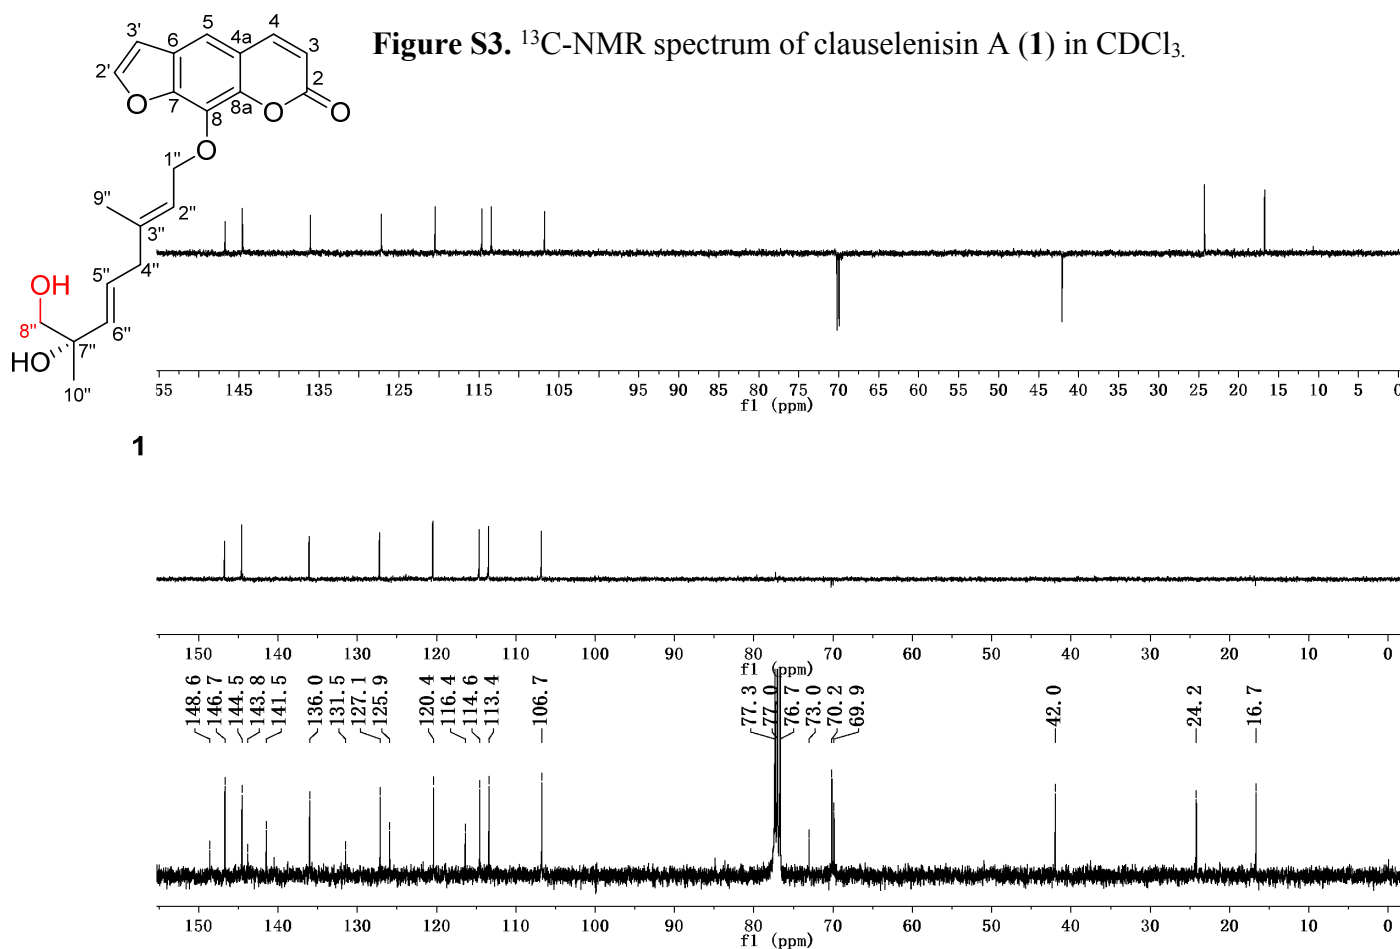

Figure S4. DEPT spectra of clauselenisin A (1) in  $\text{CDCl}_3$ .

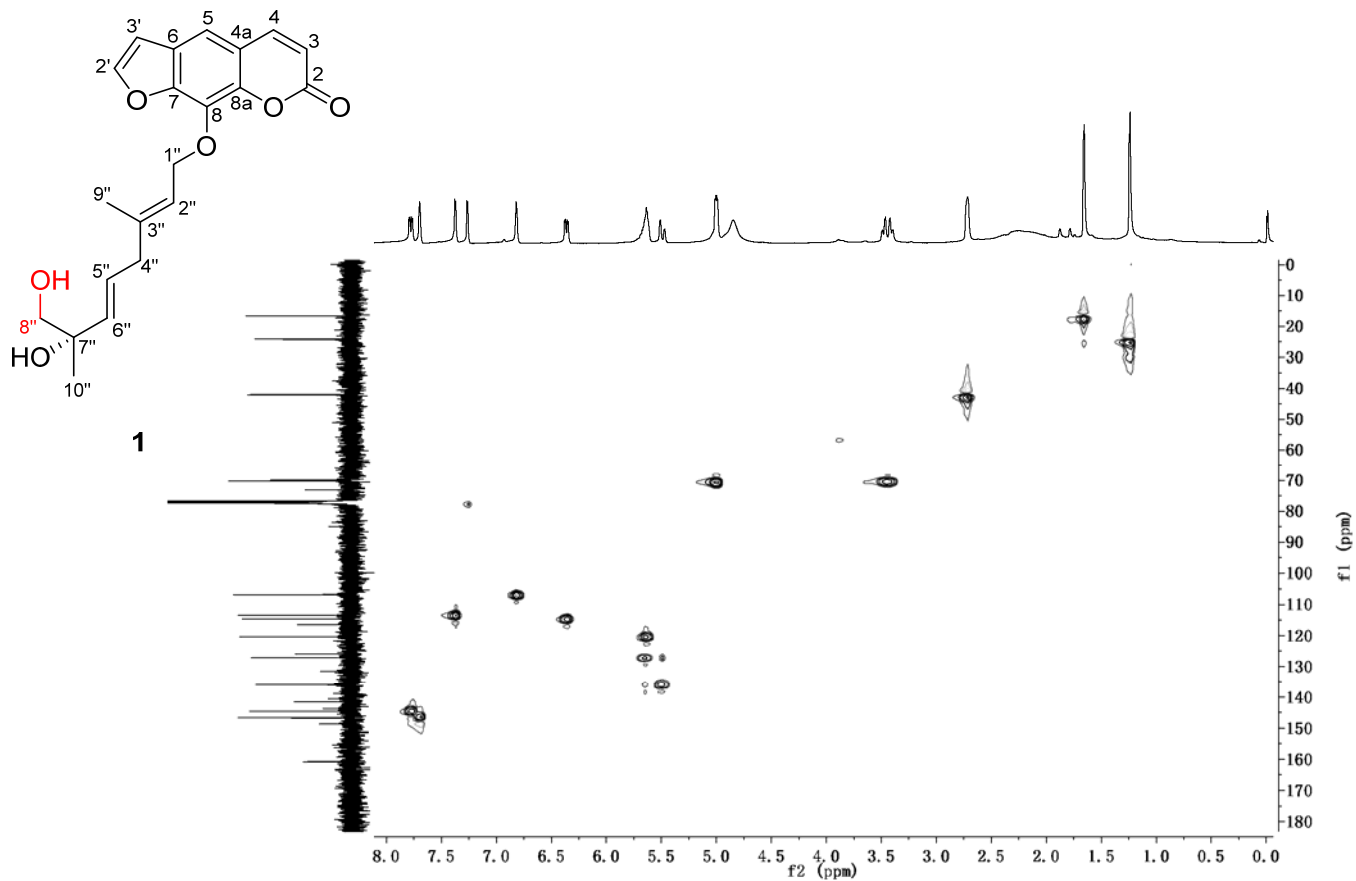

**Figure S5.** HSQC spectrum of clauselenisin A (**1**) in CDCl<sub>3</sub>.

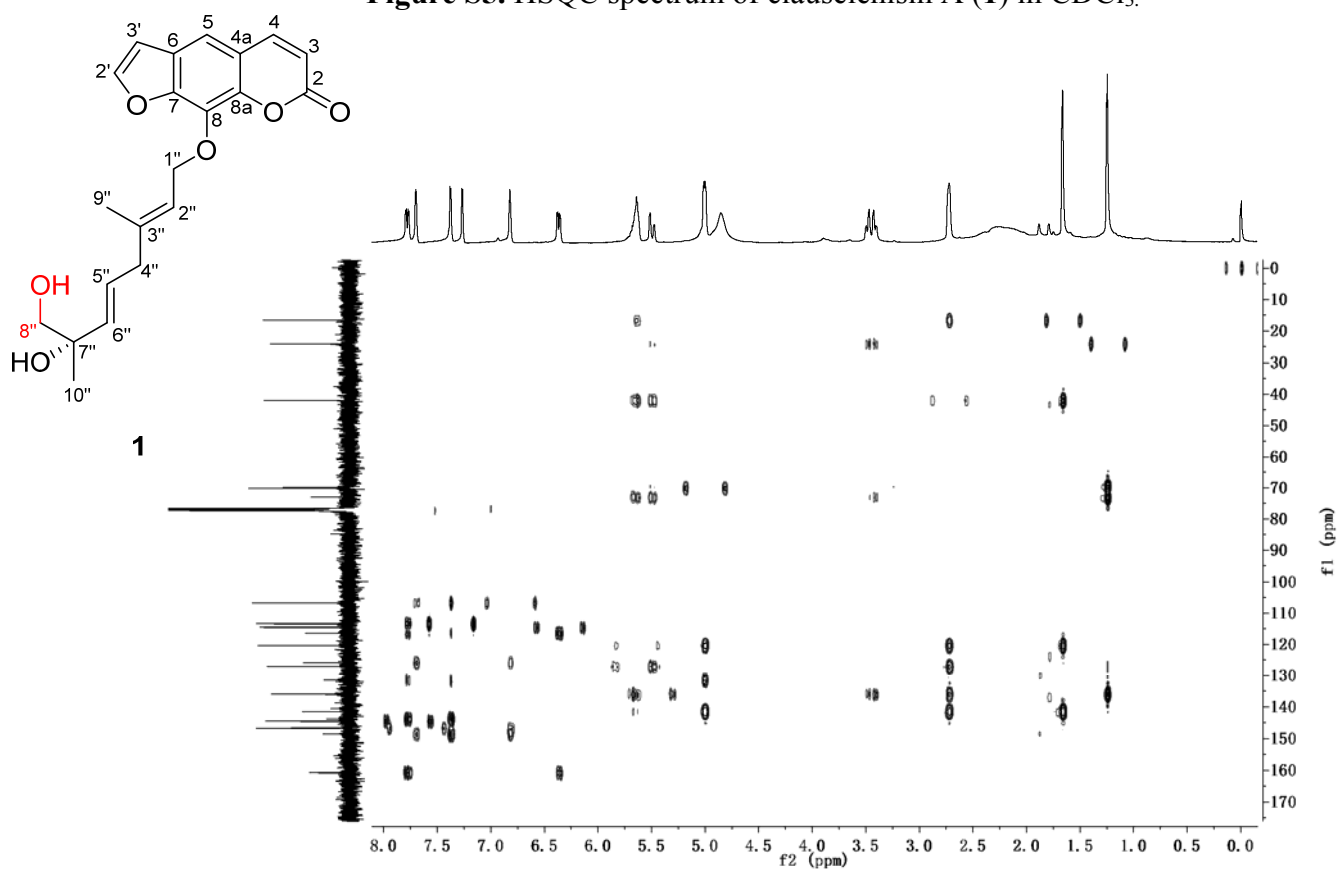

**Figure S6.** HMBC spectrum of clauselenisin A (**1**) in CDCl<sub>3</sub>.

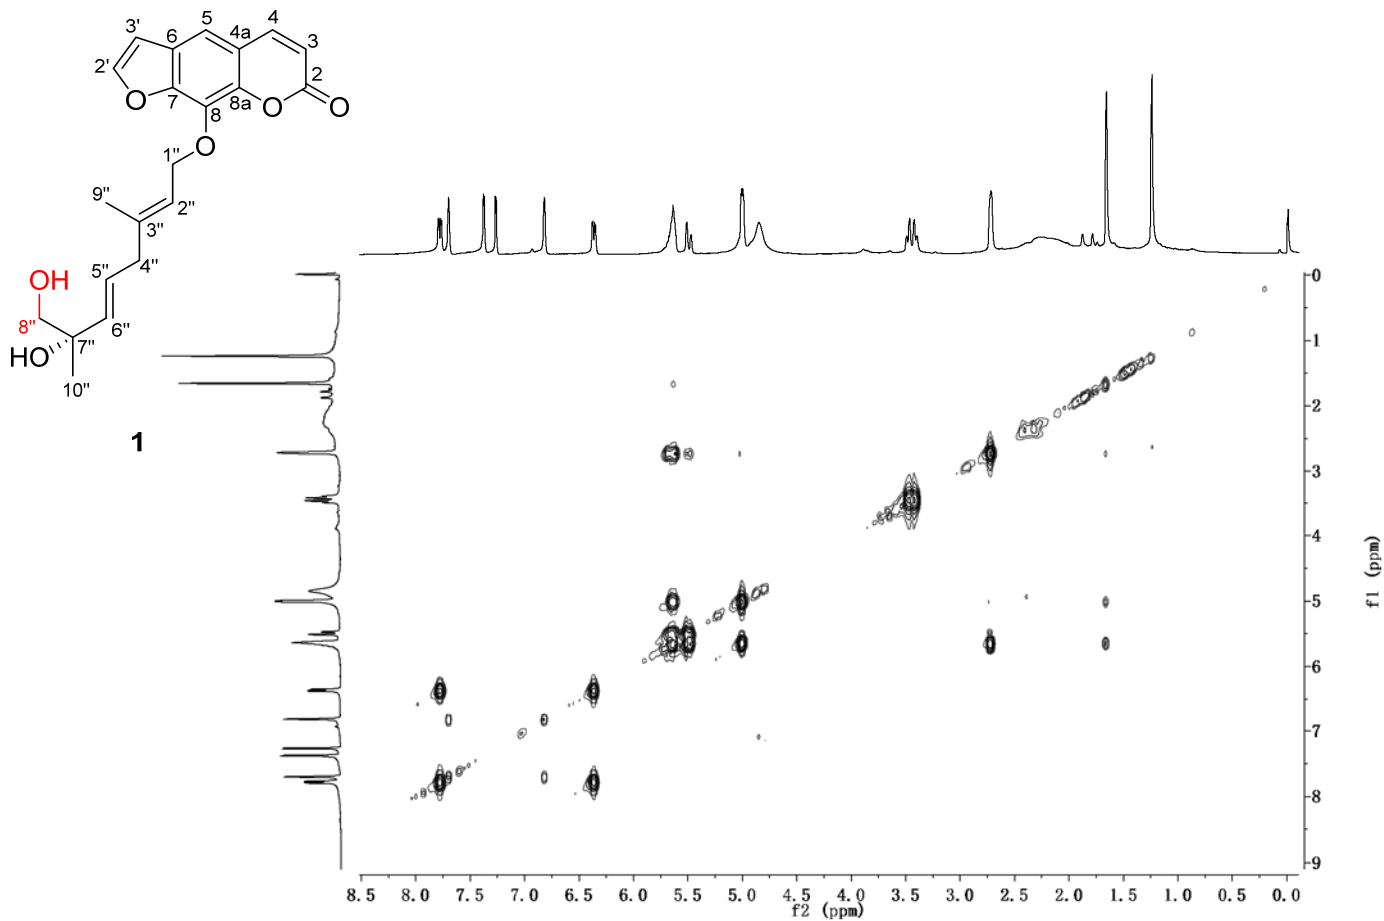

**Figure S7.**  $^1\text{H}$ - $^1\text{H}$  COSY spectrum of clauselenisin A (**1**) in  $\text{CDCl}_3$ .

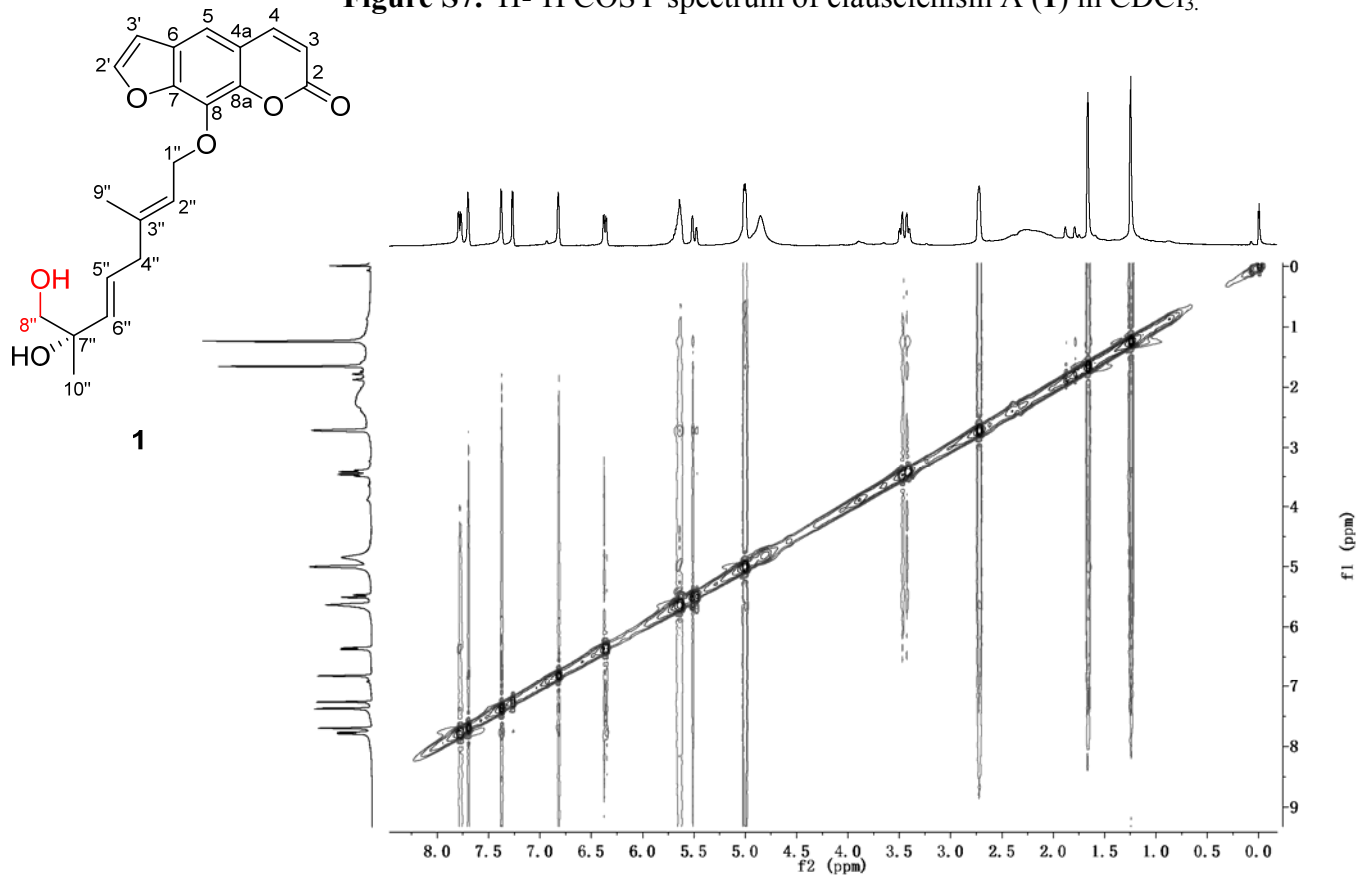

**Figure S8.** ROESY spectrum of clauselenisin A (**1**) in  $\text{CDCl}_3$ .
